# Supplementary material for: Association of Healthful Plant-based Diet Adherence With Risk of Mortality and Major Chronic Diseases Among Adults in the UK
Source: PubMed Central journal article supplement (PMC10051114; doi:10.1001/jamanetworkopen.2023.4714), 2023-03-28
Supplement: jamanetwopen-e234714-s002.pdf [file jamanetwopen-e234714-s002.pdf]

## Data Sharing Statement

Thompson. Association of Healthful Plant-based Diet Adherence With Risk of Mortality and Major Chronic Diseases Among Adults in the UK. *JAMA Netw Open*. Published March 28, 2023. doi:10.1001/jamanetworkopen.2023.4714

### Data

**Data available:** No

### Additional Information

**Explanation for why data not available:** Data from the UK Biobank cohort was used for the present study. A publication of the dataset in public repositories is not possible for data protection reasons, but the analytical dataset will be made available by the corresponding author upon request.
